# Supplementary material
Source: PubMed Central journal article supplement (PMC8157950)
Supplement: pnas.2023871118.sapp.pdf [file pnas.2023871118.sapp.pdf]

**Fig. S1:**

**A**

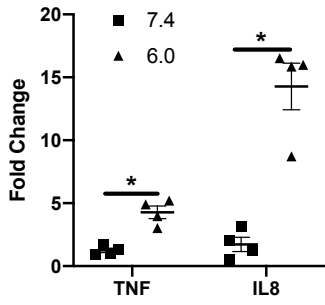

**B**

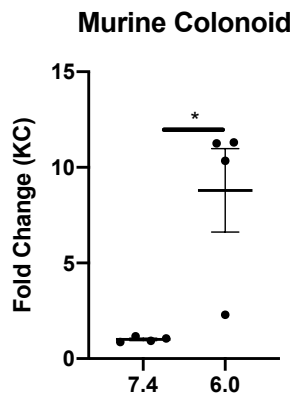

**C**

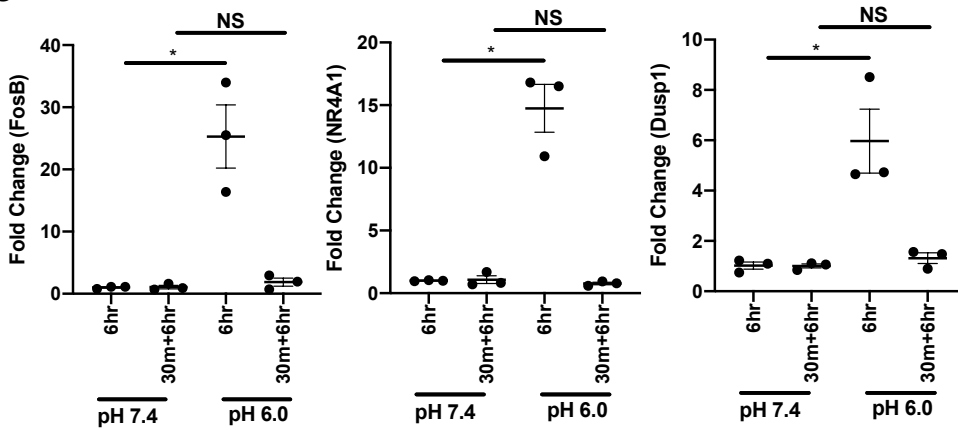

**D**

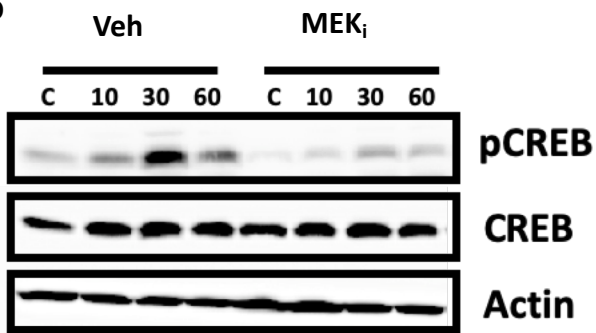

**E**

**Murine Colonoid**

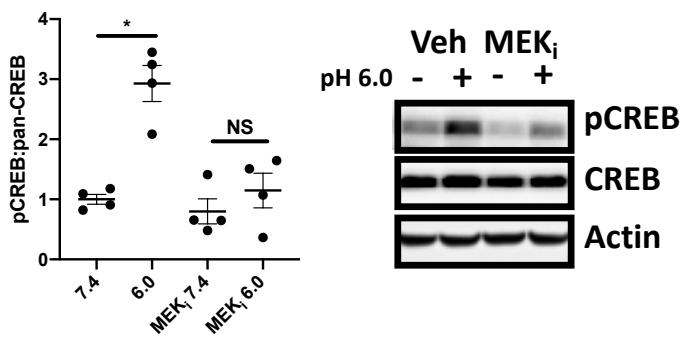

**F**

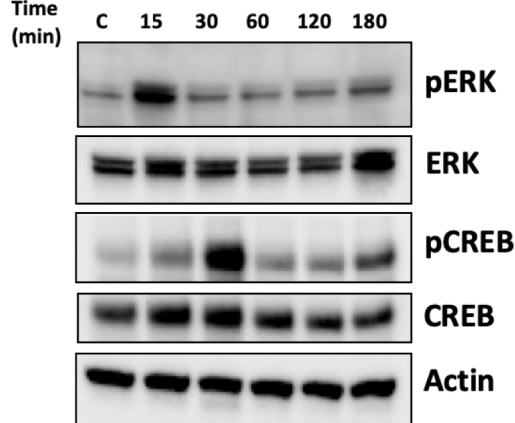

**G**

**Murine Colonoid**

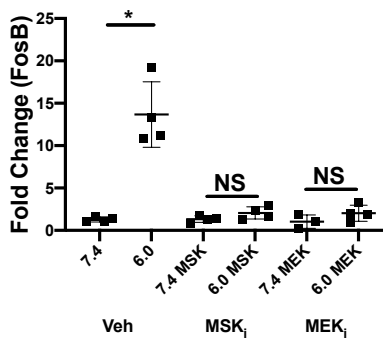

**Figure S1: Acidosis induced proinflammatory cytokines.** **a.** TNF and IL8 transcript expression in T84 IEC following exposure to pH 7.4 and 6.0 HBSS+ for 6 h (n=4). **b.** KC transcript expression in C57Bl/6 murine colonoids following exposure to pH 7.4 and 6.0 HBSS+ for 6 h (n=4). **c.** FosB, NR4A1, and Dusp1 transcript expression in T84 IEC following a 30 min exposure to pH 6.0 or 7.4 HBSS+ followed by 6 h exposure to 7.4 HBSS+ (n=3). **d.** Representative western blot of phospho-CREB and pan-CREB in T84 IEC pretreated with 10  $\mu$ m MEK<sub>i</sub> at pH 7.4 or exposed to pH 6.0 for 10, 30, and 60 min. **e.** Densitometry analysis and representative western blot of phospho-CREB and pan-CREB in murine colonoids pretreated with 10  $\mu$ m MEK<sub>i</sub> following exposure to pH 6.0 media for 30 min (n=4). **f.** FosB transcription expression in C57Bl/6 murine colonoids pretreated with 10  $\mu$ m MSK<sub>i</sub> or MEK<sub>i</sub> following 30 min exposure to pH 6.0 media (n=4). Data from each experiment was pooled and expressed as mean  $\pm$  SEM and the *p*-value determined by T-test, \**p*<0.01.

Fig. S2:

A

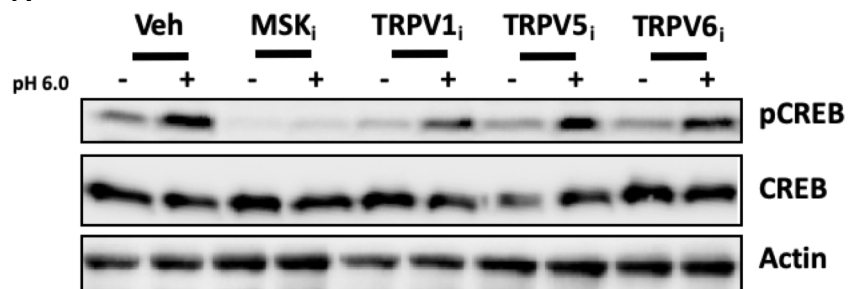

B

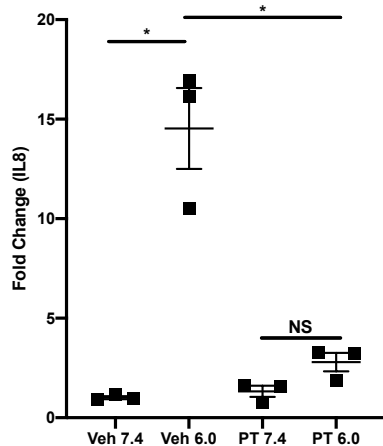

C

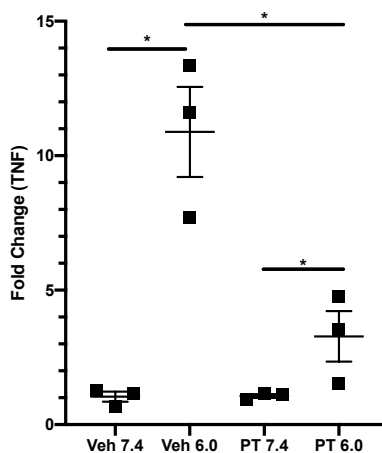

D

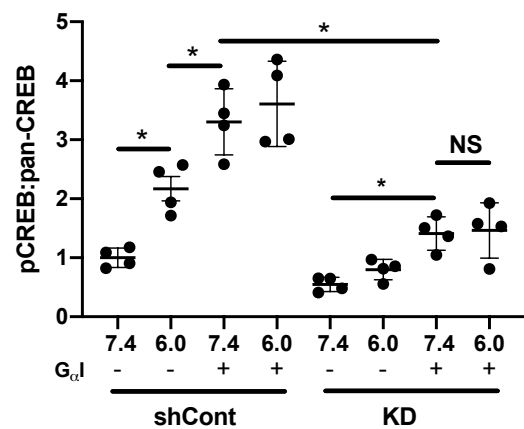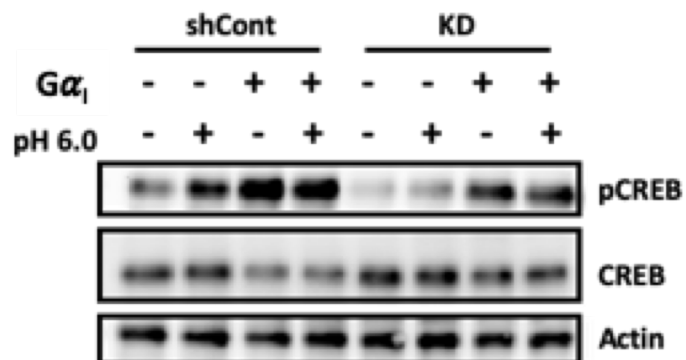

E

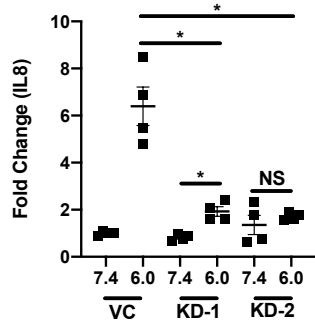

F

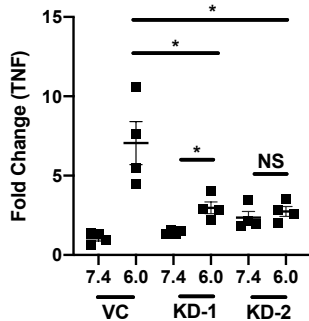

**Figure S2: Acidosis signaling through  $G\alpha_i$  associated surface receptors.** **a.** Western blot of phosphorylated and pan-CREB in T84 IEC treated with 10  $\mu\text{M}$  MSK<sub>i</sub>, TRPV1<sub>i</sub>, TRPV5<sub>i</sub>, or 100  $\mu\text{M}$  TRPV6<sub>i</sub> following 30 min exposure to pH 6.0. **b and c.** IL8 (**b**) and TNF (**c**) transcriptional expression in T84 IEC treated with 1  $\mu\text{g}/\text{ml}$  PT following 6 h exposure to pH 6.0 (n=4). **d.** Densitometry analysis and representative western blot of phosphorylated and pan-CREB in shCont and MSK1 KD T84 IEC treated with 10  $\mu\text{M}$   $G\alpha_i$  activator following 30 min exposure to pH 6.0 media (n=4). **e. and f.** IL8 (**e**) and TNF (**f**) transcriptional expression in vector control and GPR31 KD T84 IEC following 30 min exposure to pH 6.0 media (n=4). Data from each experiment was pooled and expressed as mean  $\pm$  SEM and the *p*-value determined by T-test, \**p*<0.01.

**Fig. S3:**

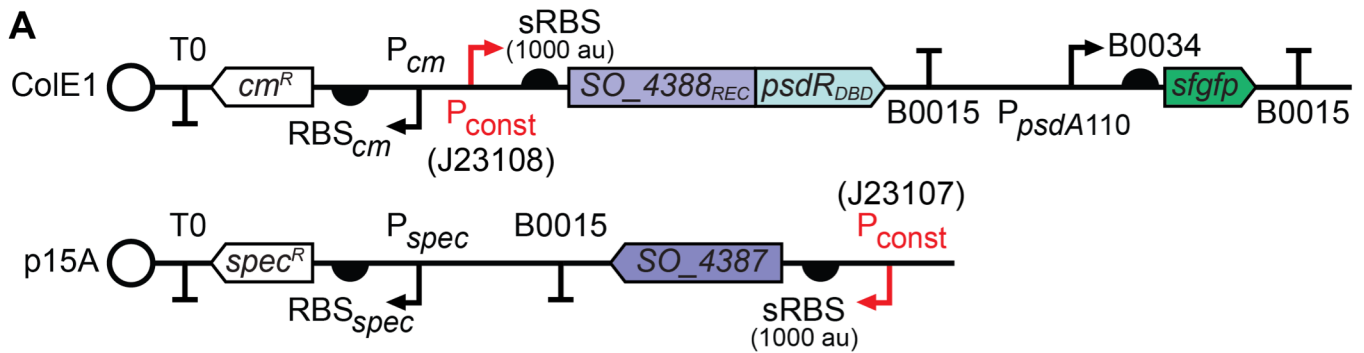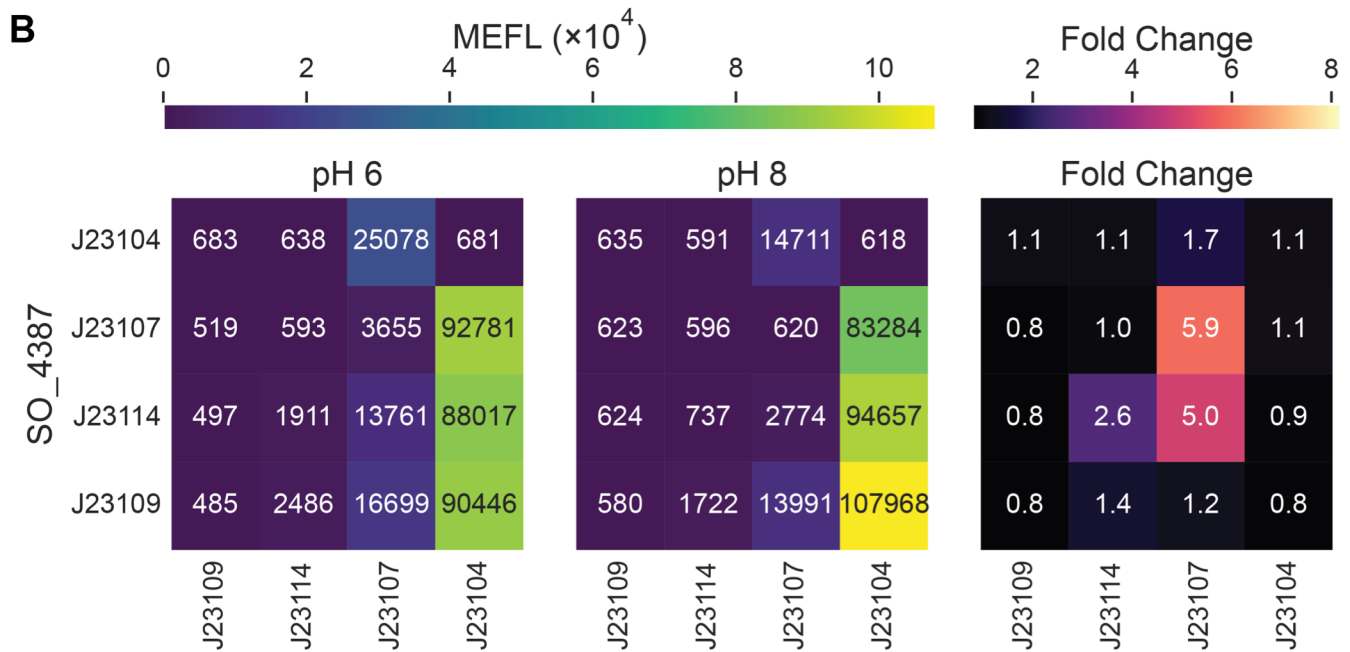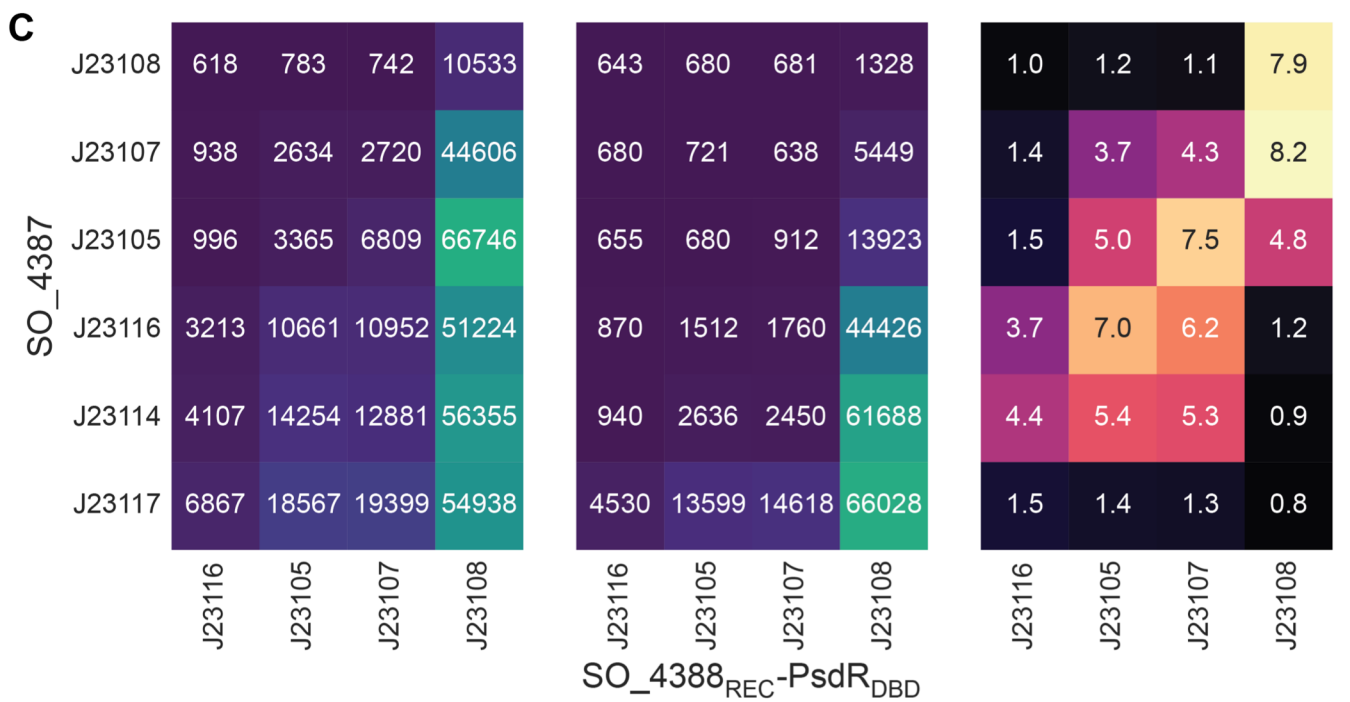

**Figure S3: Design and optimization of an acidic pH reporter *E. coli* strain for *in vivo* use. a.** Genetic diagram of constitutive pH sensor plasmids (constitutive promoter sites in red, optimal SO\_4387 and SO\_4388<sub>REC</sub>-PsdR<sub>DBD</sub> promoter names in parentheses). **b-c.** Fluorescence signal at pH 6 and pH 8 for constitutive promoter sets evaluated in first (**b**) and second (**c**) rounds of promoter optimization, with corresponding fold changes.

**Fig. S4:**

**A**

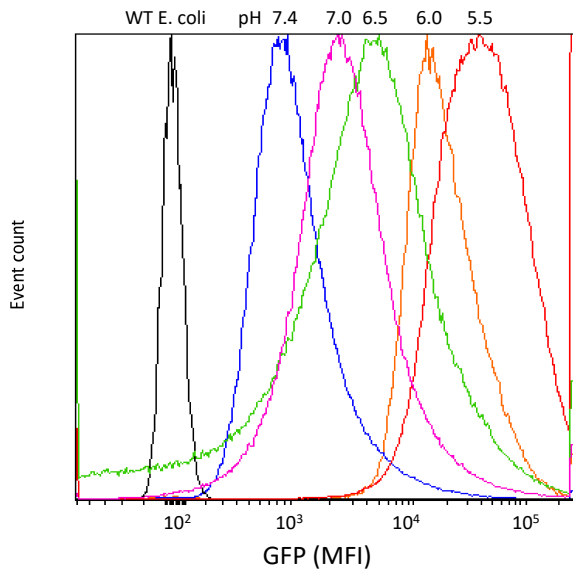

**B**

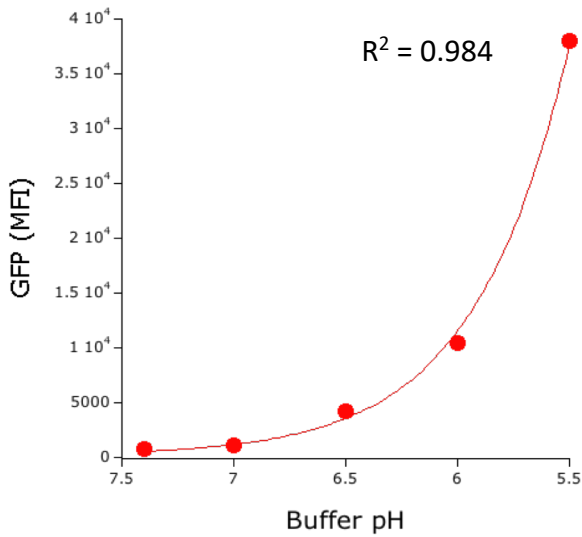

**Figure S4: Flow cytometer analysis of sfGFP expression in pH reporter K12 *E. coli*** a. Flow analysis of sfGFP intensity in WT and pH reporter K12 *E. coli* exposed to Hanks+ at pH 7.4, 7.0, 6.5, 6.0, and 5.5. b. Dose response curve of sfGFP intensity with line of best fit.

Fig. S5:

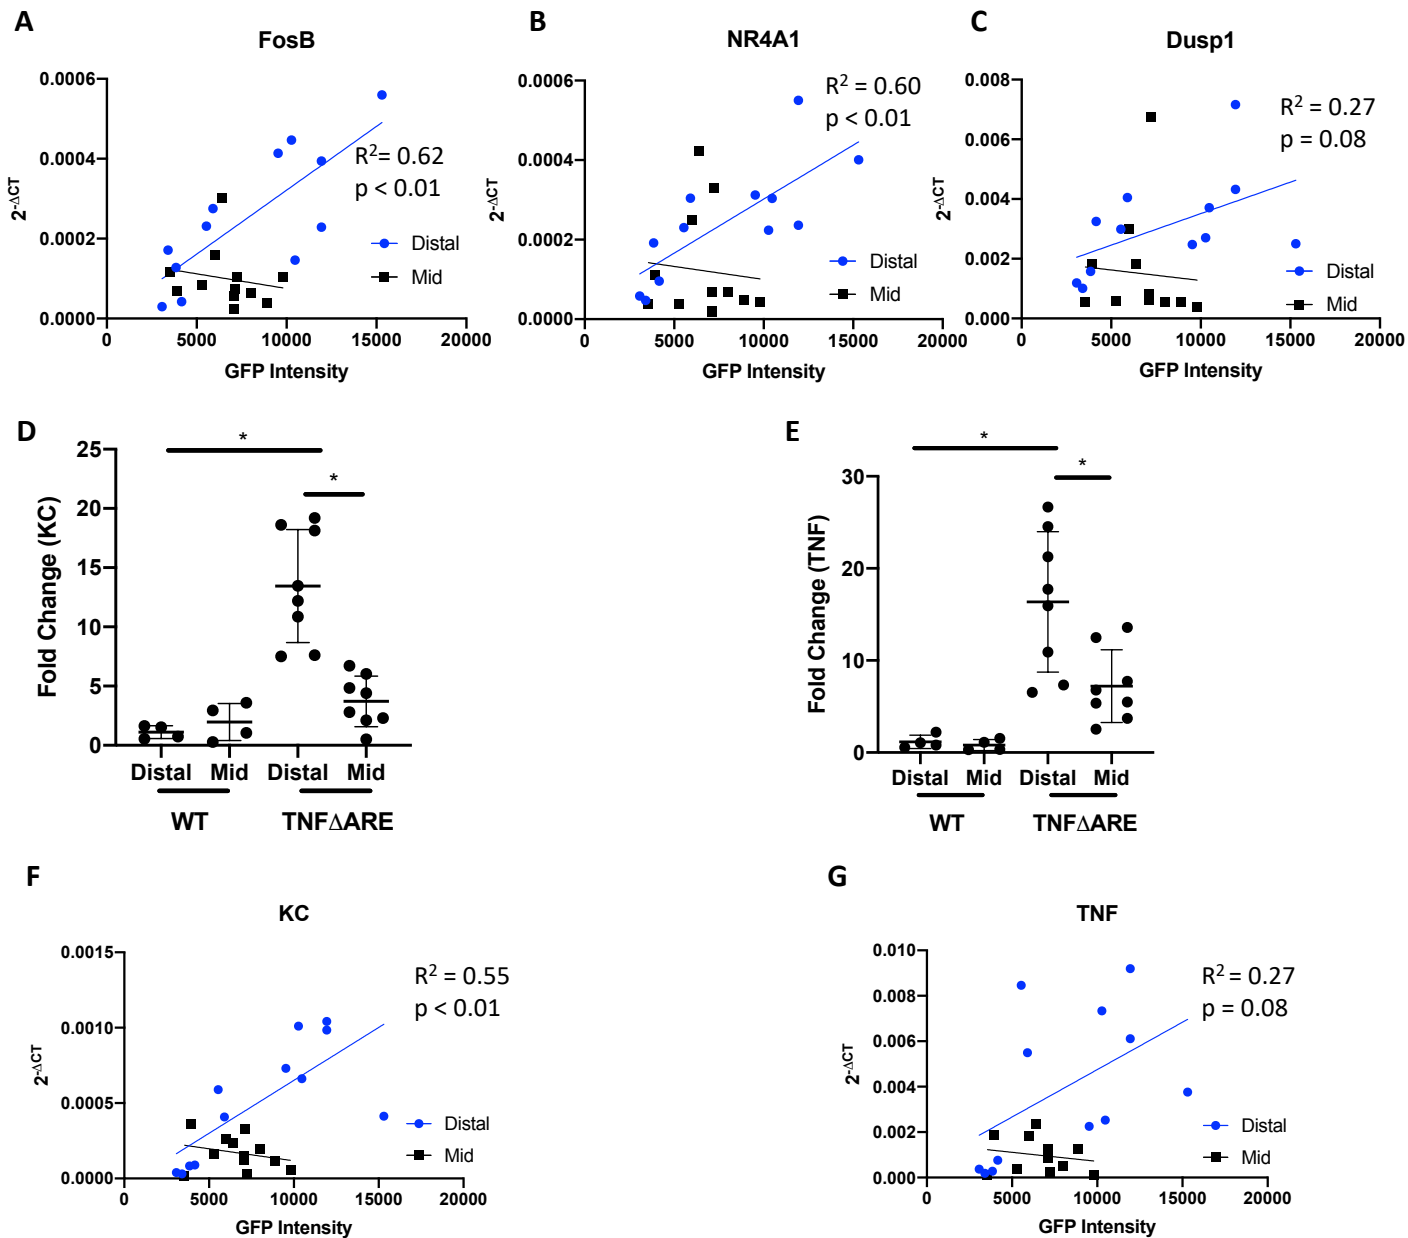

**Figure S5: Correlation between acidosis-associated gene expression and mucosal acidity. a-c.** Correlation plots comparing sGFP intensity of pH reporting K12 *E. coli* collected from the mid and distal ileum of WT and TNFΔARE mice and transcriptional expression of FosB (a), NR4A1 (b), and DUSP1 (c) ( $n=4$  and  $8$  for WT and TNFΔARE mice, respectively). **d-e.** Transcriptional expression of KC (d) and TNF (e) in tissue collected from the mid and distal ileum of WT and TNFΔARE mice ( $n=4$  and  $8$  for WT and TNFΔARE mice, respectively). **f-g.** Correlation plots comparing sGFP intensity of pH reporting *E. coli* collected from the mid and distal ileum of WT and TNFΔARE mice and transcriptional expression of KC (f) and TNF (g) ( $n=4$  and  $8$  for WT and TNFΔARE mice, respectively). Data from each experiment was pooled and expressed as mean  $\pm$  SD and the  $p$ -value determined by T-test, \* $p < 0.01$ .
